# Supplementary material for: DVGfinder: A Metasearch Tool for Identifying Defective Viral Genomes in RNA-Seq Data
Source: MDPI journal article supplement (doi:10.3390/v14051114), 2022-05-23
Supplement: s1 [file s1]

## Text S1. Generation of the synthetic samples used for the evaluation

We generate two sets of synthetic samples, one based on the SARS-CoV-2 genome and the other based on the TuMV genome (both viral references are available in <https://github.com/MJmaolu/DVGfinder/tree/v3/ExternalNeeds/references>). For each group of samples (SARS-CoV-2 and TuMV) the list of random DVGs were generated once, then, the variable parameter was the total number of reads of the final fastq.

To generate each one of the synthetic datasets we followed the following steps:

- 1) Generate a list of random DVGs considering all the structural types (deletions forward, deletions reverse, insertions forward, insertions reverse, 5' cb/sb and 3' cb/sb) in equal proportions. While randomly generating each identifier, and before including it in the list, we confirmed that the DVG was not present in the previous set (neither in its direct nor in its reverse complementary form).
- 2) Generate the sequences corresponding to each DVG. These sequences are exactly the same as the reference except for the abnormal junction. For the reconstruction of the sequence, we followed the same rules that explained in Table 2 for calculating the theoretical length of the DVGs.
- 3) For each library size or number of total reads in the final fastq ( $N_{total}$ ):
  - a. Considering the number of total reads to be in the final fastq ( $N_{total}$ ), the length of each concrete DVG ( $length\ genome_i$ ), the length of the reads ( $length\ reads = 100$ ) and the proportion of the DVG in the sample ( $proportion_i$ ), we calculated the number of synthetic reads ( $N_{dvg\ i}$ ) to generate for each type of genome (equations 1-7 in S3).
  - b. Given the DVG sequence, and the defined parameters, simulate the synthetic reads with the program wgsim [Wgsim (short read simulator) <https://github.com/lh3/wgsim>] without any error/mutation rate (parameters related to the addition of variation set to zero: -e0 -r0 -R0 -X0).
  - c. Repeat points a and b for the complete viral genome.
  - d. Concatenate all the reads in one fastq file.

In total, we generated 24 fastq samples, 12 based on each genome, with the library sizes ( $N_{total}$ ) specified in Section 2.7. The composition ratio was 60% for the DVG population and 40% for the complete genome in all the datasets. About the composition of the DVG population, we used 216 different DVGs for the SARS-CoV-2 datasets and 72 for the TuMV ones in order to obtain the same density of defectives in both synthetic datasets (the length of the second is one third of the first so the number of defectives present is also one third).

**Text S2. Calculation of the number of synthetic reads ( $N_{dvg\ i}$ ) to generate for each one of the DVGs composing the synthetic datasets**

We took as  $proportion_i$  the ratio of the  $genome_i$  in the sample, i.e., in a sample composed by the complete virus and one type of DVG, a proportion of 0.5 means that for each complete genome are one DVG. Taking this into account, and knowing that the mean depth of a sample is defined by:

$$meanDepth = \frac{N \times length\ reads}{length\ genome} \quad (1),$$

and that the total number of reads in the final synthetic dataset is:

$$N_{total} = N_{wt} + N_{dvg_1} + N_{dvg_2} + \dots + N_{dvg_n} = N_i + \dots + N_n \quad (2).$$

We can extract the total number of reads ( $N_{total}$ ) of Eq. 1 and substitute in Eq. 2, obtaining

$$N_{total} = \sum_{i=1}^n \frac{meanDepth_i \times length\ genome_i}{length\ reads} \quad (3).$$

Also, if all the genomes present in the sample share a common coordinate where the proportion of them can be calculated ( $meanDepth_{total\ in\ Common\ Coordinate}$ ), considering as  $genome_i$  proportion:

$$proportion_i = \frac{number\ genomes_i}{total\ genomes} = \frac{meanDepth_i}{meanDepth_{total\ in\ Common\ Coordinate}} \quad (4).$$

We can now write the mean depth of each genome ( $meanDepth_i$ ) as a function of the common variable  $meanDepth_{total\ in\ Common\ Coordinate}$ :

$$N_{total} = \frac{meanDepth_{total\ in\ Common\ Coordinate}}{length\ reads} \times \sum_{i=1}^n (proportion_i \times length\ genome_i) \quad (5)$$

and

$$meanDepth_{total\ in\ Common\ Coordinate} = \frac{N_{total} \times length\ reads}{\sum_{i=1}^n (proportion_i \times length\ genome_i)} \quad (6).$$

Knowing the average depth in the common coordinate, it is finally possible to calculate the number of reads ( $N_{dvg\ i}$ ) with which each genome must be generated in the synthetic sample in order to maintain the desired ratio:

$$N_{dvg\ i} = \frac{proportion_i \times meanDepth_{total\ in\ Common\ Coordinate} \times length\ genome_i}{length\ reads} \quad (7).$$

Figure S1. A recommended general pipeline for real samples

(\* DI-tector recommendation)

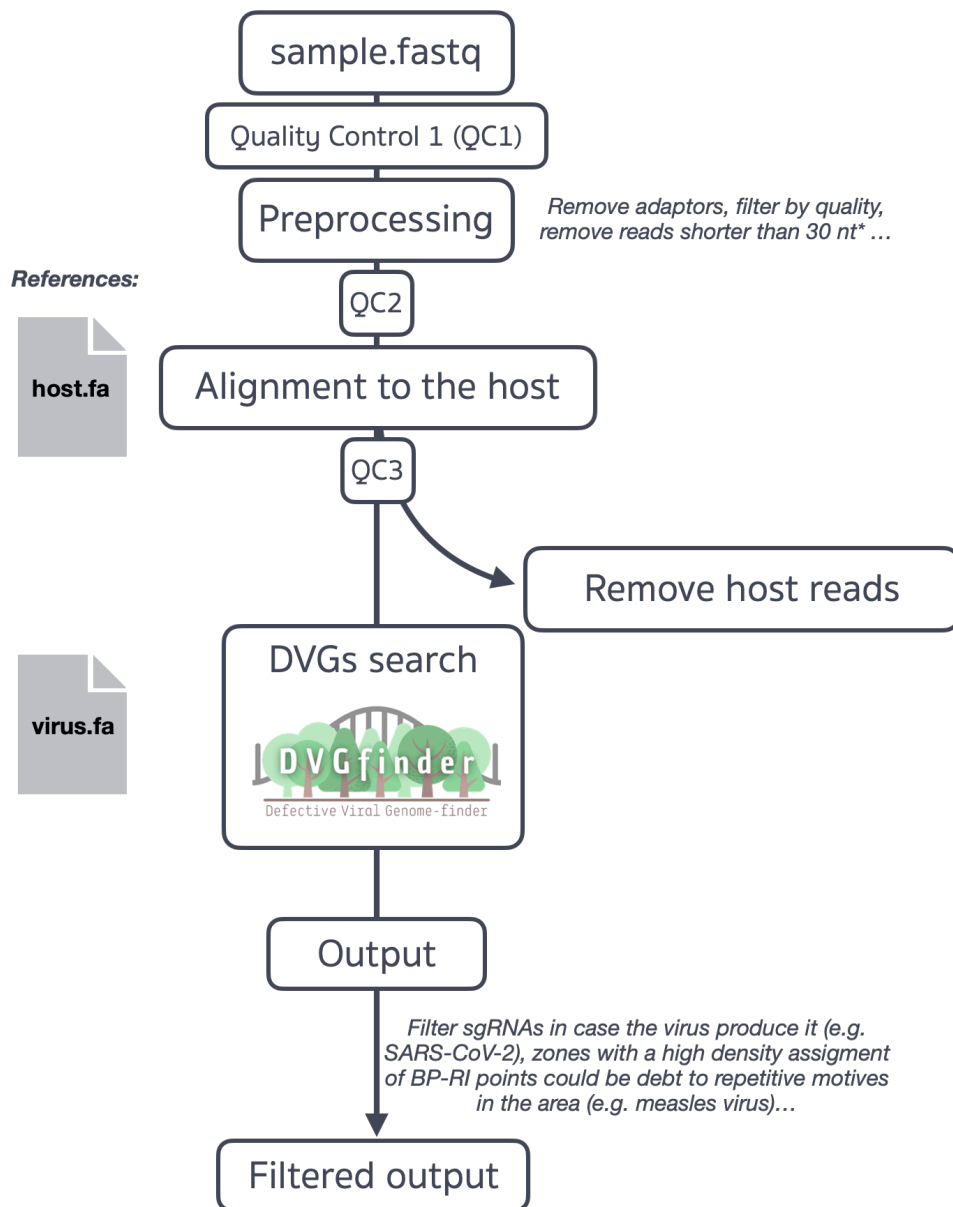

**Figure S2. Example of the behavior of the two search algorithms on the SARS-CoV-2 small (100 K reads) and large (10 M reads) synthetic samples.** For simplicity, the DVG sense has not been considered. Red points represent the true events in the sample while the crosses represent candidates identified by each program (A-B: ViReMa-a; C-D: DI-tector). True positives correspond to cases in which red points and crosses coincide, orphan crosses correspond to false positives and orphan red points to false negatives. ViReMa-a works better than DI-tector at both coverages.

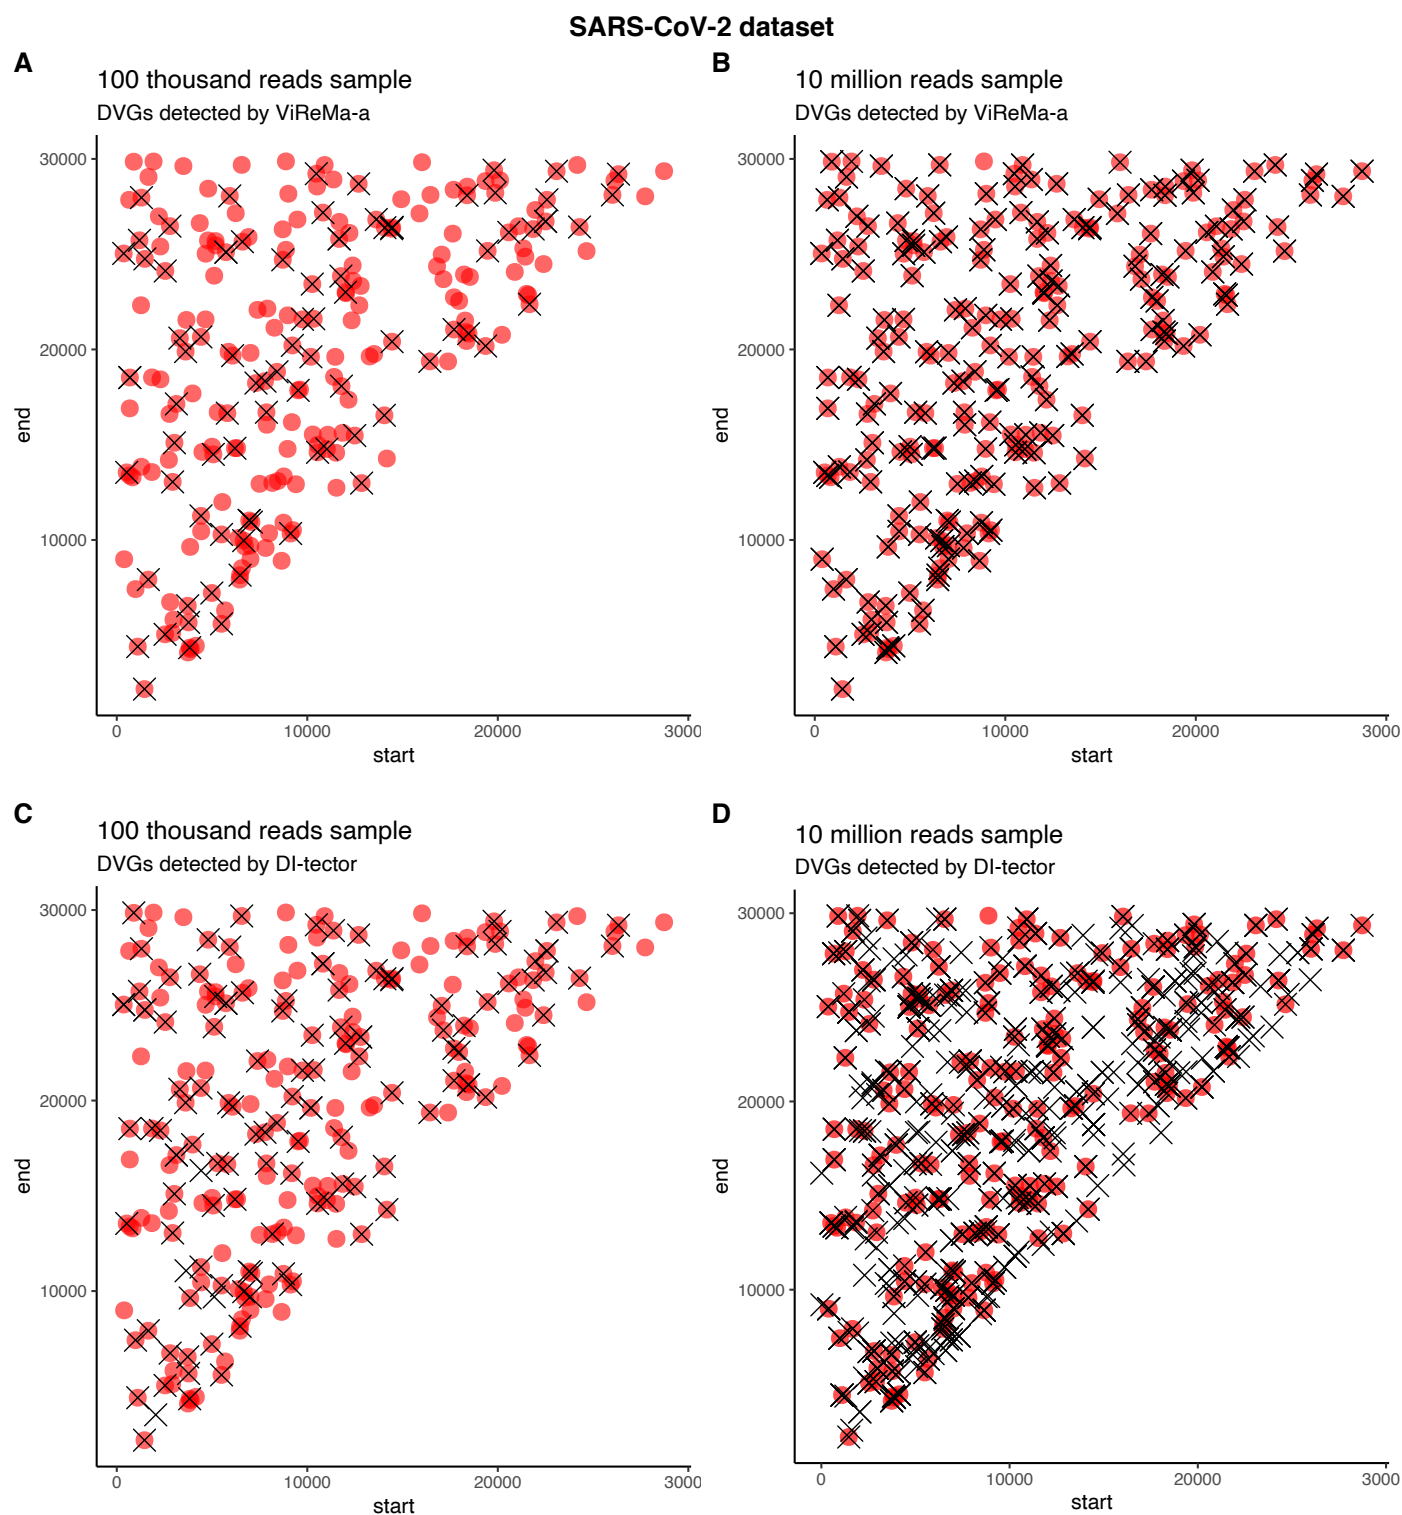

**Figure S3. Copybacks detected by DVGfinder (black points) in samples SRR8719995 (first column), SRR8719996 (center column) and SRR8719998 (right column).** The red asterisks are the cb validated by RT-PCR by the authors of the samples. The output is separated by program of detection (ViReMa-a: *a-c*, DI-tector: *d-f*) and by DVGfinder mode (Metasearch: *g-i*, Consensus: *j-l* and Filtered: *m-o*). The size of points is proportional to the number of reads found for each case.

**a** ViReMa-a

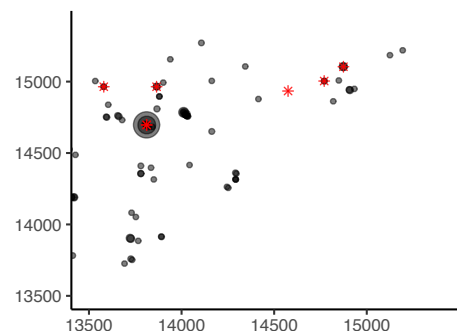

**b**

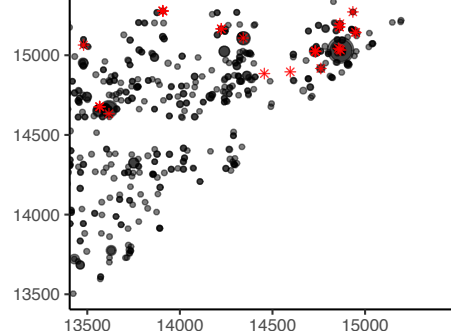

**c**

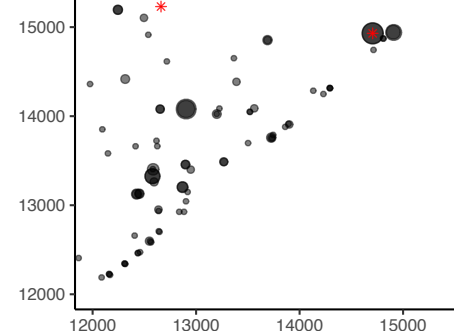

**d** DI-tector

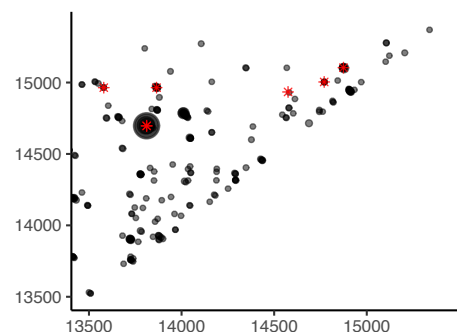

**e**

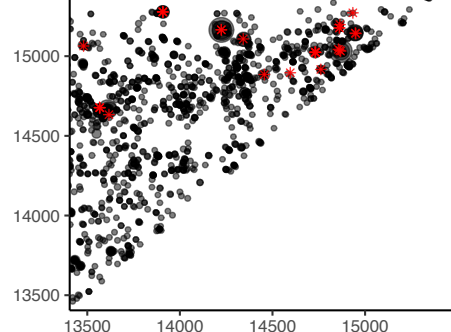

**f**

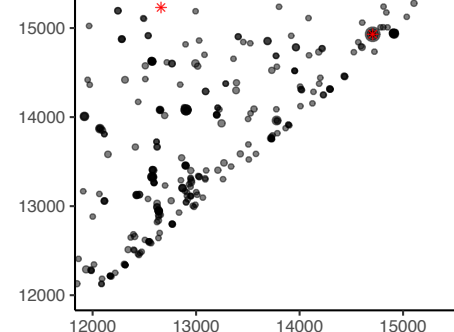

**g** DVGfinder: Metasearch

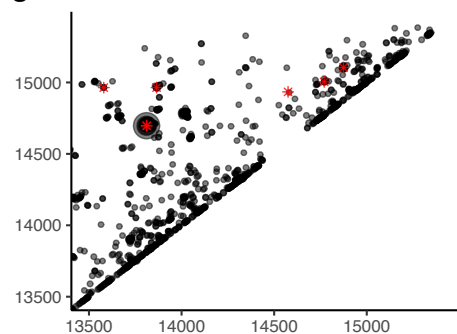

**h**

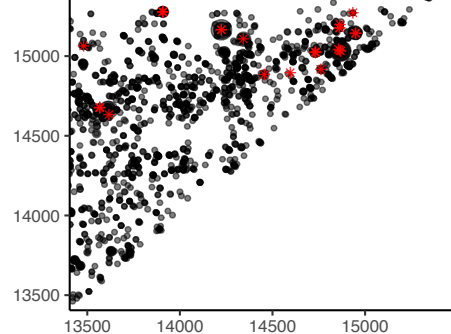

**i**

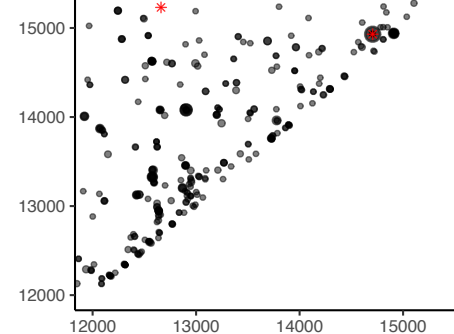

**j** DVGfinder: Consensus

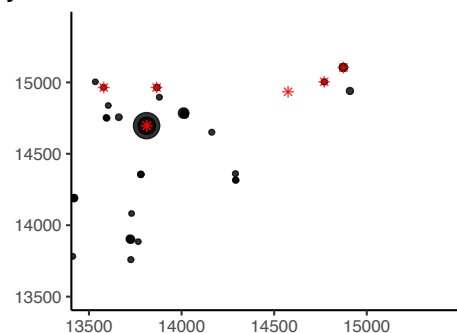

**k**

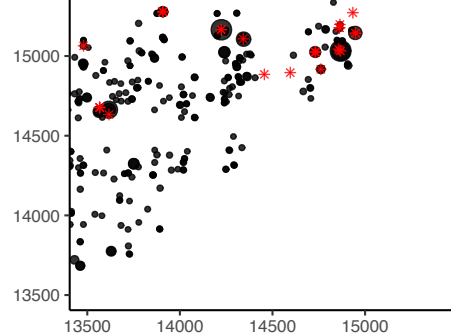

**l**

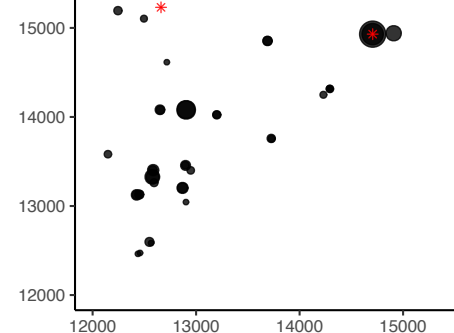

**m** DVGfinder: Filtered

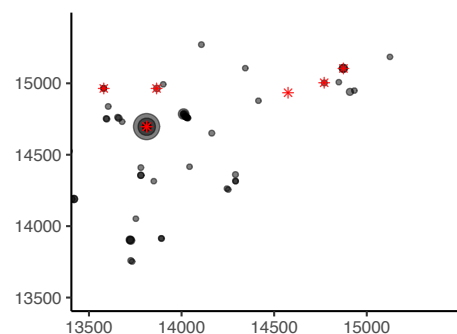

**n**

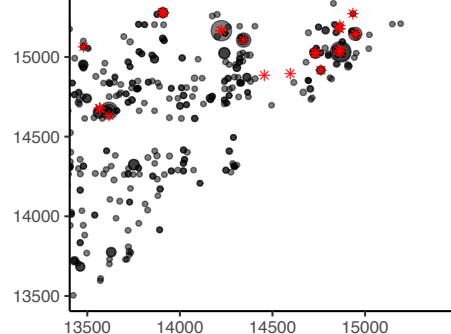

**o**

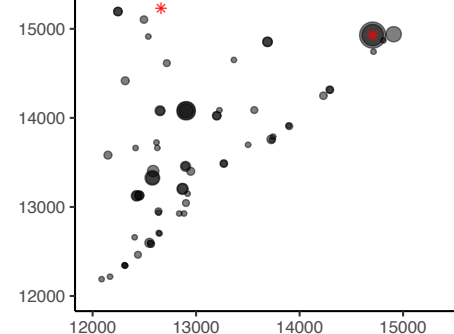

**Table S1. List of random DVGs generated for each synthetic dataset. Also the proportion of each genome is indicated.**

The list of the random DVGs present in the synthetic datasets and its ratio is available in [45]. Also, the 24 fastq files used for the evaluation can be download [46].

**SARS-CoV-2 dataset:**

| cID_DI         | sense | BP    | RI    | DVG_type          | proportion | length_dvg |
|----------------|-------|-------|-------|-------------------|------------|------------|
| ++_8276_21139  | ++    | 8276  | 21139 | Deletion_forward  | 0.003      | 17041      |
| ++_10338_21607 | ++    | 10338 | 21607 | Deletion_forward  | 0.003      | 18635      |
| ++_650_27853   | ++    | 650   | 27853 | Deletion_forward  | 0.003      | 2701       |
| ++_7019_19818  | ++    | 7019  | 19818 | Deletion_forward  | 0.003      | 17105      |
| ++_984_7423    | ++    | 984   | 7423  | Deletion_forward  | 0.003      | 23465      |
| ++_17055_24978 | ++    | 17055 | 24978 | Deletion_forward  | 0.003      | 21981      |
| ++_8165_12993  | ++    | 8165  | 12993 | Deletion_forward  | 0.003      | 25076      |
| ++_22400_24481 | ++    | 22400 | 24481 | Deletion_forward  | 0.003      | 27823      |
| ++_26334_29200 | ++    | 26334 | 29200 | Deletion_forward  | 0.003      | 27038      |
| ++_19865_28219 | ++    | 19865 | 28219 | Deletion_forward  | 0.003      | 21550      |
| ++_1930_29865  | ++    | 1930  | 29865 | Deletion_forward  | 0.003      | 1969       |
| ++_24659_25162 | ++    | 24659 | 25162 | Deletion_forward  | 0.003      | 29401      |
| ++_7494_12948  | ++    | 7494  | 12948 | Deletion_forward  | 0.003      | 24450      |
| ++_21970_27319 | ++    | 21970 | 27319 | Deletion_forward  | 0.003      | 24555      |
| ++_18227_23933 | ++    | 18227 | 23933 | Deletion_forward  | 0.003      | 24198      |
| ++_3025_15101  | ++    | 3025  | 15101 | Deletion_forward  | 0.003      | 17828      |
| ++_11858_15625 | ++    | 11858 | 15625 | Deletion_forward  | 0.003      | 26137      |
| ++_9005_28173  | ++    | 9005  | 28173 | Deletion_forward  | 0.003      | 10736      |
| ++_1665_29052  | ++    | 1665  | 29052 | Deletion_forward  | 0.003      | 2517       |
| ++_8710_26306  | ++    | 8710  | 26306 | Deletion_forward  | 0.003      | 12308      |
| ++_682_16908   | ++    | 682   | 16908 | Deletion_forward  | 0.003      | 13678      |
| ++_3612_19888  | ++    | 3612  | 19888 | Deletion_forward  | 0.003      | 13628      |
| ++_5185_25687  | ++    | 5185  | 25687 | Deletion_forward  | 0.003      | 9402       |
| ++_11512_14577 | ++    | 11512 | 14577 | Deletion_forward  | 0.003      | 26839      |
| ++_10513_28550 | ++    | 10513 | 28550 | Deletion_forward  | 0.003      | 11867      |
| ++_13620_26819 | ++    | 13620 | 26819 | Deletion_forward  | 0.003      | 16705      |
| ++_18535_23805 | ++    | 18535 | 23805 | Deletion_forward  | 0.003      | 24634      |
| ++_1100_4403   | ++    | 1100  | 4403  | Deletion_forward  | 0.003      | 26601      |
| ++_10553_14994 | ++    | 10553 | 14994 | Deletion_forward  | 0.003      | 25463      |
| ++_6203_14816  | ++    | 6203  | 14816 | Deletion_forward  | 0.003      | 21291      |
| ++_8964_14780  | ++    | 8964  | 14780 | Deletion_forward  | 0.003      | 24088      |
| ++_11073_15523 | ++    | 11073 | 15523 | Deletion_forward  | 0.003      | 25454      |
| ++_19465_25174 | ++    | 19465 | 25174 | Deletion_forward  | 0.003      | 24195      |
| ++_4417_20657  | ++    | 4417  | 20657 | Deletion_forward  | 0.003      | 13664      |
| ++_20890_24069 | ++    | 20890 | 24069 | Deletion_forward  | 0.003      | 26725      |
| ++_11531_12740 | ++    | 11531 | 12740 | Deletion_forward  | 0.003      | 28695      |
| ++_24869_21446 | ++    | 24869 | 21446 | Insertion_forward | 0.003      | 33327      |
| ++_10454_4429  | ++    | 10454 | 4429  | Insertion_forward | 0.003      | 35929      |
| ++_13843_1289  | ++    | 13843 | 1289  | Insertion_forward | 0.003      | 42458      |
| ++_18827_8410  | ++    | 18827 | 8410  | Insertion_forward | 0.003      | 40321      |
| ++_18431_2292  | ++    | 18431 | 2292  | Insertion_forward | 0.003      | 46043      |
| ++_29406_19805 | ++    | 29406 | 19805 | Insertion_forward | 0.003      | 39505      |
| ++_28837_19357 | ++    | 28837 | 19357 | Insertion_forward | 0.003      | 39384      |
| ++_26467_21081 | ++    | 26467 | 21081 | Insertion_forward | 0.003      | 35290      |
| ++_11264_4420  | ++    | 11264 | 4420  | Insertion_forward | 0.003      | 36748      |
| ++_21529_12327 | ++    | 21529 | 12327 | Insertion_forward | 0.003      | 39106      |
| ++_22318_1271  | ++    | 22318 | 1271  | Insertion_forward | 0.003      | 50951      |
| ++_29624_3496  | ++    | 29624 | 3496  | Insertion_forward | 0.003      | 56032      |
| ++_22735_17696 | ++    | 22735 | 17696 | Insertion_forward | 0.003      | 34943      |

|                |    |       |       |                   |       |       |
|----------------|----|-------|-------|-------------------|-------|-------|
| ++_22373_21666 | ++ | 22373 | 21666 | Insertion_forward | 0.003 | 30611 |
| ++_23851_11766 | ++ | 23851 | 11766 | Insertion_forward | 0.003 | 41989 |
| ++_23688_17146 | ++ | 23688 | 17146 | Insertion_forward | 0.003 | 36446 |
| ++_13093_8452  | ++ | 13093 | 8452  | Insertion_forward | 0.003 | 34545 |
| ++_14771_11028 | ++ | 14771 | 11028 | Insertion_forward | 0.003 | 33647 |
| ++_26425_24290 | ++ | 26425 | 24290 | Insertion_forward | 0.003 | 32039 |
| ++_25728_1190  | ++ | 25728 | 1190  | Insertion_forward | 0.003 | 54442 |
| ++_25403_2283  | ++ | 25403 | 2283  | Insertion_forward | 0.003 | 53024 |
| ++_28440_4797  | ++ | 28440 | 4797  | Insertion_forward | 0.003 | 53547 |
| ++_15537_10290 | ++ | 15537 | 10290 | Insertion_forward | 0.003 | 35151 |
| ++_20211_9217  | ++ | 20211 | 9217  | Insertion_forward | 0.003 | 40898 |
| ++_9702_7012   | ++ | 9702  | 7012  | Insertion_forward | 0.003 | 32594 |
| ++_7921_6449   | ++ | 7921  | 6449  | Insertion_forward | 0.003 | 31376 |
| ++_23871_5113  | ++ | 23871 | 5113  | Insertion_forward | 0.003 | 48662 |
| ++_13566_1842  | ++ | 13566 | 1842  | Insertion_forward | 0.003 | 41628 |
| ++_26320_21854 | ++ | 26320 | 21854 | Insertion_forward | 0.003 | 34370 |
| ++_19612_11469 | ++ | 19612 | 11469 | Insertion_forward | 0.003 | 38047 |
| ++_17895_9617  | ++ | 17895 | 9617  | Insertion_forward | 0.003 | 38182 |
| ++_14895_5002  | ++ | 14895 | 5002  | Insertion_forward | 0.003 | 39797 |
| ++_5674_3770   | ++ | 5674  | 3770  | Insertion_forward | 0.003 | 31808 |
| ++_8520_6566   | ++ | 8520  | 6566  | Insertion_forward | 0.003 | 31858 |
| ++_22849_21599 | ++ | 22849 | 21599 | Insertion_forward | 0.003 | 31154 |
| ++_25463_5190  | ++ | 25463 | 5190  | Insertion_forward | 0.003 | 50177 |
| --_26631_4356  | -- | 26631 | 4356  | Deletion_reverse  | 0.003 | 7629  |
| --_7920_1655   | -- | 7920  | 1655  | Deletion_reverse  | 0.003 | 23639 |
| --_16615_2767  | -- | 16615 | 2767  | Deletion_reverse  | 0.003 | 16056 |
| --_18335_7778  | -- | 18335 | 7778  | Deletion_reverse  | 0.003 | 19347 |
| --_24406_12379 | -- | 24406 | 12379 | Deletion_reverse  | 0.003 | 17877 |
| --_26335_14425 | -- | 26335 | 14425 | Deletion_reverse  | 0.003 | 17994 |
| --_10515_9246  | -- | 10515 | 9246  | Deletion_reverse  | 0.003 | 28635 |
| --_22077_7387  | -- | 22077 | 7387  | Deletion_reverse  | 0.003 | 15214 |
| --_22318_12730 | -- | 22318 | 12730 | Deletion_reverse  | 0.003 | 20316 |
| --_5600_5498   | -- | 5600  | 5498  | Deletion_reverse  | 0.003 | 29802 |
| --_29223_10474 | -- | 29223 | 10474 | Deletion_reverse  | 0.003 | 11155 |
| --_27968_1294  | -- | 27968 | 1294  | Deletion_reverse  | 0.003 | 3230  |
| --_26393_14073 | -- | 26393 | 14073 | Deletion_reverse  | 0.003 | 17584 |
| --_21789_8977  | -- | 21789 | 8977  | Deletion_reverse  | 0.003 | 17092 |
| --_25037_363   | -- | 25037 | 363   | Deletion_reverse  | 0.003 | 5230  |
| --_24704_8713  | -- | 24704 | 8713  | Deletion_reverse  | 0.003 | 13913 |
| --_13049_2932  | -- | 13049 | 2932  | Deletion_reverse  | 0.003 | 19787 |
| --_4445_4148   | -- | 4445  | 4148  | Deletion_reverse  | 0.003 | 29607 |
| --_25800_11671 | -- | 25800 | 11671 | Deletion_reverse  | 0.003 | 15775 |
| --_13548_521   | -- | 13548 | 521   | Deletion_reverse  | 0.003 | 16877 |
| --_14492_5067  | -- | 14492 | 5067  | Deletion_reverse  | 0.003 | 20479 |
| --_24119_2545  | -- | 24119 | 2545  | Deletion_reverse  | 0.003 | 8330  |
| --_21518_18285 | -- | 21518 | 18285 | Deletion_reverse  | 0.003 | 26671 |
| --_27884_14929 | -- | 27884 | 14929 | Deletion_reverse  | 0.003 | 16949 |
| --_17853_9521  | -- | 17853 | 9521  | Deletion_reverse  | 0.003 | 21572 |
| --_28382_17683 | -- | 28382 | 17683 | Deletion_reverse  | 0.003 | 19205 |
| --_25723_4790  | -- | 25723 | 4790  | Deletion_reverse  | 0.003 | 8971  |
| --_9655_6728   | -- | 9655  | 6728  | Deletion_reverse  | 0.003 | 26977 |
| --_4273_3881   | -- | 4273  | 3881  | Deletion_reverse  | 0.003 | 29512 |
| --_19369_17388 | -- | 19369 | 17388 | Deletion_reverse  | 0.003 | 27923 |
| --_9966_6662   | -- | 9966  | 6662  | Deletion_reverse  | 0.003 | 26600 |
| --_5047_2535   | -- | 5047  | 2535  | Deletion_reverse  | 0.003 | 27392 |
| --_29681_10910 | -- | 29681 | 10910 | Deletion_reverse  | 0.003 | 11133 |



|                |    |       |       |                   |       |       |
|----------------|----|-------|-------|-------------------|-------|-------|
| --_21579_9746  | -- | 21579 | 9746  | Deletion_reverse  | 0.003 | 18071 |
| --_20911_18330 | -- | 20911 | 18330 | Deletion_reverse  | 0.003 | 27323 |
| --_23001_12007 | -- | 23001 | 12007 | Deletion_reverse  | 0.003 | 18910 |
| --_12695_28693 | -- | 12695 | 28693 | Insertion_reverse | 0.003 | 45902 |
| --_3826_4349   | -- | 3826  | 4349  | Insertion_reverse | 0.003 | 30427 |
| --_6596_25655  | -- | 6596  | 25655 | Insertion_reverse | 0.003 | 48963 |
| --_6952_11025  | -- | 6952  | 11025 | Insertion_reverse | 0.003 | 33977 |
| --_7991_10354  | -- | 7991  | 10354 | Insertion_reverse | 0.003 | 32267 |
| --_16810_24366 | -- | 16810 | 24366 | Insertion_reverse | 0.003 | 37460 |
| --_5298_16704  | -- | 5298  | 16704 | Insertion_reverse | 0.003 | 41310 |
| --_11373_28920 | -- | 11373 | 28920 | Insertion_reverse | 0.003 | 47451 |
| --_6315_14823  | -- | 6315  | 14823 | Insertion_reverse | 0.003 | 38412 |
| --_2734_14205  | -- | 2734  | 14205 | Insertion_reverse | 0.003 | 41375 |
| --_5802_16654  | -- | 5802  | 16654 | Insertion_reverse | 0.003 | 40756 |
| --_9401_12926  | -- | 9401  | 12926 | Insertion_reverse | 0.003 | 33429 |
| --_8750_10907  | -- | 8750  | 10907 | Insertion_reverse | 0.003 | 32061 |
| --_10540_14600 | -- | 10540 | 14600 | Insertion_reverse | 0.003 | 33964 |
| --_10262_23430 | -- | 10262 | 23430 | Insertion_reverse | 0.003 | 43072 |
| --_4666_25023  | -- | 4666  | 25023 | Insertion_reverse | 0.003 | 50261 |
| --_12038_22951 | -- | 12038 | 22951 | Insertion_reverse | 0.003 | 40817 |
| --_15888_27136 | -- | 15888 | 27136 | Insertion_reverse | 0.003 | 41152 |
| --_2800_6742   | -- | 2800  | 6742  | Insertion_reverse | 0.003 | 33846 |
| --_2977_5822   | -- | 2977  | 5822  | Insertion_reverse | 0.003 | 32749 |
| --_8878_25230  | -- | 8878  | 25230 | Insertion_reverse | 0.003 | 46256 |
| --_6399_10107  | -- | 6399  | 10107 | Insertion_reverse | 0.003 | 33612 |
| --_12210_26116 | -- | 12210 | 26116 | Insertion_reverse | 0.003 | 43810 |
| --_16434_19373 | -- | 16434 | 19373 | Insertion_reverse | 0.003 | 32843 |
| --_4658_21577  | -- | 4658  | 21577 | Insertion_reverse | 0.003 | 46823 |
| --_12162_17363 | -- | 12162 | 17363 | Insertion_reverse | 0.003 | 35105 |
| --_1455_2174   | -- | 1455  | 2174  | Insertion_reverse | 0.003 | 30623 |
| --_3852_9636   | -- | 3852  | 9636  | Insertion_reverse | 0.003 | 35688 |
| --_24171_29682 | -- | 24171 | 29682 | Insertion_reverse | 0.003 | 35415 |
| --_18354_20443 | -- | 18354 | 20443 | Insertion_reverse | 0.003 | 31993 |
| --_27736_28035 | -- | 27736 | 28035 | Insertion_reverse | 0.003 | 30203 |
| --_3309_20592  | -- | 3309  | 20592 | Insertion_reverse | 0.003 | 47187 |
| --_14455_26405 | -- | 14455 | 26405 | Insertion_reverse | 0.003 | 41854 |
| --_28728_29356 | -- | 28728 | 29356 | Insertion_reverse | 0.003 | 30532 |
| --_9482_26819  | -- | 9482  | 26819 | Insertion_reverse | 0.003 | 47241 |
| --_5930_28056  | -- | 5930  | 28056 | Insertion_reverse | 0.003 | 52030 |
| +-_12403_23593 | +- | 12403 | 23593 | 5cb/sb            | 0.003 | 35996 |
| +-_11793_18074 | +- | 11793 | 18074 | 5cb/sb            | 0.003 | 29867 |
| +-_21046_17703 | +- | 21046 | 17703 | 5cb/sb            | 0.003 | 38749 |
| +-_26122_28866 | +- | 26122 | 28866 | 5cb/sb            | 0.003 | 54988 |
| +-_25901_6915  | +- | 25901 | 6915  | 5cb/sb            | 0.003 | 32816 |
| +-_18526_686   | +- | 18526 | 686   | 5cb/sb            | 0.003 | 19212 |
| +-_20408_14450 | +- | 20408 | 14450 | 5cb/sb            | 0.003 | 34858 |
| +-_5115_2905   | +- | 5115  | 2905  | 5cb/sb            | 0.003 | 8020  |
| +-_18397_28546 | +- | 18397 | 28546 | 5cb/sb            | 0.003 | 46943 |
| +-_16542_14044 | +- | 16542 | 14044 | 5cb/sb            | 0.003 | 30586 |
| +-_9581_7812   | +- | 9581  | 7812  | 5cb/sb            | 0.003 | 17393 |
| +-_20578_26144 | +- | 20578 | 26144 | 5cb/sb            | 0.003 | 46722 |
| +-_10937_7066  | +- | 10937 | 7066  | 5cb/sb            | 0.003 | 18003 |
| +-_26696_11682 | +- | 26696 | 11682 | 5cb/sb            | 0.003 | 38378 |
| +-_17634_26079 | +- | 17634 | 26079 | 5cb/sb            | 0.003 | 43713 |
| +-_20219_20768 | +- | 20219 | 20768 | 5cb/sb            | 0.003 | 40987 |
| +-_8154_6472   | +- | 8154  | 6472  | 5cb/sb            | 0.003 | 14626 |

|                |    |       |       |        |       |       |
|----------------|----|-------|-------|--------|-------|-------|
| +-_27183_10819 | +- | 27183 | 10819 | 5cb/sb | 0.003 | 38002 |
| +-_22545_17969 | +- | 22545 | 17969 | 5cb/sb | 0.003 | 40514 |
| +-_26472_2791  | +- | 26472 | 2791  | 5cb/sb | 0.003 | 29263 |
| +-_10291_5498  | +- | 10291 | 5498  | 5cb/sb | 0.003 | 15789 |
| +-_23084_29353 | +- | 23084 | 29353 | 5cb/sb | 0.003 | 52437 |
| +-_29853_892   | +- | 29853 | 892   | 5cb/sb | 0.003 | 30745 |
| +-_8908_8652   | +- | 8908  | 8652  | 5cb/sb | 0.003 | 17560 |
| +-_5684_6307   | +- | 5684  | 6307  | 5cb/sb | 0.003 | 11991 |
| +-_16465_28111 | +- | 16465 | 28111 | 5cb/sb | 0.003 | 44576 |
| +-_13335_8766  | +- | 13335 | 8766  | 5cb/sb | 0.003 | 22101 |
| +-_6547_3723   | +- | 6547  | 3723  | 5cb/sb | 0.003 | 10270 |
| +-_29687_6557  | +- | 29687 | 6557  | 5cb/sb | 0.003 | 36244 |
| +-_12851_12986 | +- | 12851 | 12986 | 5cb/sb | 0.003 | 25837 |
| +-_5731_25105  | +- | 5731  | 25105 | 5cb/sb | 0.003 | 30836 |
| +-_4990_7217   | +- | 4990  | 7217  | 5cb/sb | 0.003 | 12207 |
| +-_26016_28109 | +- | 26016 | 28109 | 5cb/sb | 0.003 | 54125 |
| +-_20832_18464 | +- | 20832 | 18464 | 5cb/sb | 0.003 | 39296 |
| +-_17141_3129  | +- | 17141 | 3129  | 5cb/sb | 0.003 | 20270 |
| +-_1475_24753  | +- | 1475  | 24753 | 5cb/sb | 0.003 | 26228 |
| -+_19674_6080  | -+ | 19674 | 6080  | 3cb/sb | 0.003 | 34054 |
| -+_22918_21516 | -+ | 22918 | 21516 | 3cb/sb | 0.003 | 15374 |
| -+_19762_13507 | -+ | 19762 | 13507 | 3cb/sb | 0.003 | 26539 |
| -+_8997_7015   | -+ | 8997  | 7015  | 3cb/sb | 0.003 | 43796 |
| -+_19359_20180 | -+ | 19359 | 20180 | 3cb/sb | 0.003 | 20269 |
| -+_19615_10189 | -+ | 19615 | 10189 | 3cb/sb | 0.003 | 30004 |
| -+_7873_16046  | -+ | 7873  | 16046 | 3cb/sb | 0.003 | 35889 |
| -+_9190_16184  | -+ | 9190  | 16184 | 3cb/sb | 0.003 | 34434 |
| -+_829_13289   | -+ | 829   | 13289 | 3cb/sb | 0.003 | 45690 |
| -+_23334_12800 | -+ | 23334 | 12800 | 3cb/sb | 0.003 | 23674 |
| -+_9125_10339  | -+ | 9125  | 10339 | 3cb/sb | 0.003 | 40344 |
| -+_28876_20118 | -+ | 28876 | 20118 | 3cb/sb | 0.003 | 10814 |
| -+_7855_16702  | -+ | 7855  | 16702 | 3cb/sb | 0.003 | 35251 |
| -+_7308_18235  | -+ | 7308  | 18235 | 3cb/sb | 0.003 | 34265 |
| -+_8989_387    | -+ | 8989  | 387   | 3cb/sb | 0.003 | 50432 |
| -+_18559_11406 | -+ | 18559 | 11406 | 3cb/sb | 0.003 | 29843 |
| -+_7904_22146  | -+ | 7904  | 22146 | 3cb/sb | 0.003 | 29758 |
| -+_27856_22579 | -+ | 27856 | 22579 | 3cb/sb | 0.003 | 9373  |
| -+_16022_29826 | -+ | 16022 | 29826 | 3cb/sb | 0.003 | 13960 |
| -+_5540_11993  | -+ | 5540  | 11993 | 3cb/sb | 0.003 | 42275 |
| -+_14176_14275 | -+ | 14176 | 14275 | 3cb/sb | 0.003 | 31357 |
| -+_27152_6243  | -+ | 27152 | 6243  | 3cb/sb | 0.003 | 26413 |
| -+_1852_18533  | -+ | 1852  | 18533 | 3cb/sb | 0.003 | 39423 |
| -+_28090_18385 | -+ | 28090 | 18385 | 3cb/sb | 0.003 | 13333 |
| -+_19631_13276 | -+ | 19631 | 13276 | 3cb/sb | 0.003 | 26901 |
| -+_5869_19878  | -+ | 5869  | 19878 | 3cb/sb | 0.003 | 34061 |
| -+_15481_12490 | -+ | 15481 | 12490 | 3cb/sb | 0.003 | 31837 |
| -+_29870_8878  | -+ | 29870 | 8878  | 3cb/sb | 0.003 | 21060 |
| -+_21338_25306 | -+ | 21338 | 25306 | 3cb/sb | 0.003 | 13164 |
| -+_26986_2210  | -+ | 26986 | 2210  | 3cb/sb | 0.003 | 30612 |
| -+_4495_14621  | -+ | 4495  | 14621 | 3cb/sb | 0.003 | 40692 |
| -+_13384_677   | -+ | 13384 | 677   | 3cb/sb | 0.003 | 45747 |
| -+_3976_17690  | -+ | 3976  | 17690 | 3cb/sb | 0.003 | 38142 |
| -+_21548_3654  | -+ | 21548 | 3654  | 3cb/sb | 0.003 | 34606 |
| -+_3737_4096   | -+ | 3737  | 4096  | 3cb/sb | 0.003 | 51975 |
| -+_22508_26718 | -+ | 22508 | 26718 | 3cb/sb | 0.003 | 10582 |

**TuMV dataset:**

| cID_DI       | sense | BP   | RI   | DVG_type          | proportion | length_dvg |
|--------------|-------|------|------|-------------------|------------|------------|
| ++_5016_8357 | ++    | 5016 | 8357 | Deletion_forward  | 0.003      | 6492       |
| ++_4533_4797 | ++    | 4533 | 4797 | Deletion_forward  | 0.003      | 9569       |
| ++_2365_3647 | ++    | 2365 | 3647 | Deletion_forward  | 0.003      | 8551       |
| ++_4022_7019 | ++    | 4022 | 7019 | Deletion_forward  | 0.003      | 6836       |
| ++_1784_6060 | ++    | 1784 | 6060 | Deletion_forward  | 0.003      | 5557       |
| ++_8649_9348 | ++    | 8649 | 9348 | Deletion_forward  | 0.003      | 9134       |
| ++_4166_6105 | ++    | 4166 | 6105 | Deletion_forward  | 0.003      | 7894       |
| ++_7365_9680 | ++    | 7365 | 9680 | Deletion_forward  | 0.003      | 7518       |
| ++_2963_6925 | ++    | 2963 | 6925 | Deletion_forward  | 0.003      | 5871       |
| ++_6000_6040 | ++    | 6000 | 6040 | Deletion_forward  | 0.003      | 9793       |
| ++_55_8684   | ++    | 55   | 8684 | Deletion_forward  | 0.003      | 1204       |
| ++_745_6507  | ++    | 745  | 6507 | Deletion_forward  | 0.003      | 4071       |
| ++_4275_1502 | ++    | 4275 | 1502 | Insertion_forward | 0.003      | 12606      |
| ++_7574_5084 | ++    | 7574 | 5084 | Insertion_forward | 0.003      | 12323      |
| ++_8581_1436 | ++    | 8581 | 1436 | Insertion_forward | 0.003      | 16978      |
| ++_7321_1004 | ++    | 7321 | 1004 | Insertion_forward | 0.003      | 16150      |
| ++_8076_3193 | ++    | 8076 | 3193 | Insertion_forward | 0.003      | 14716      |
| ++_4845_3612 | ++    | 4845 | 3612 | Insertion_forward | 0.003      | 11066      |
| ++_5215_4600 | ++    | 5215 | 4600 | Insertion_forward | 0.003      | 10448      |
| ++_3792_3598 | ++    | 3792 | 3598 | Insertion_forward | 0.003      | 10027      |
| ++_7724_6110 | ++    | 7724 | 6110 | Insertion_forward | 0.003      | 11447      |
| ++_4061_2927 | ++    | 4061 | 2927 | Insertion_forward | 0.003      | 10967      |
| ++_8223_2746 | ++    | 8223 | 2746 | Insertion_forward | 0.003      | 15310      |
| ++_8365_7470 | ++    | 8365 | 7470 | Insertion_forward | 0.003      | 10728      |
| --_6225_704  | --    | 6225 | 704  | Deletion_reverse  | 0.003      | 4312       |
| --_8665_4479 | --    | 8665 | 4479 | Deletion_reverse  | 0.003      | 5647       |
| --_7242_3859 | --    | 7242 | 3859 | Deletion_reverse  | 0.003      | 6450       |
| --_5147_3516 | --    | 5147 | 3516 | Deletion_reverse  | 0.003      | 8202       |
| --_6092_49   | --    | 6092 | 49   | Deletion_reverse  | 0.003      | 3790       |
| --_2957_621  | --    | 2957 | 621  | Deletion_reverse  | 0.003      | 7497       |
| --_4654_4560 | --    | 4654 | 4560 | Deletion_reverse  | 0.003      | 9739       |
| --_8273_1909 | --    | 8273 | 1909 | Deletion_reverse  | 0.003      | 3469       |
| --_2302_1051 | --    | 2302 | 1051 | Deletion_reverse  | 0.003      | 8582       |
| --_9642_5893 | --    | 9642 | 5893 | Deletion_reverse  | 0.003      | 6084       |
| --_8254_3000 | --    | 8254 | 3000 | Deletion_reverse  | 0.003      | 4579       |
| --_8595_5065 | --    | 8595 | 5065 | Deletion_reverse  | 0.003      | 6303       |
| --_7501_8757 | --    | 7501 | 8757 | Insertion_reverse | 0.003      | 11089      |
| --_918_8831  | --    | 918  | 8831 | Insertion_reverse | 0.003      | 17746      |
| --_8925_9229 | --    | 8925 | 9229 | Insertion_reverse | 0.003      | 10137      |
| --_1803_5741 | --    | 1803 | 5741 | Insertion_reverse | 0.003      | 13771      |
| --_5149_8484 | --    | 5149 | 8484 | Insertion_reverse | 0.003      | 13168      |
| --_552_5442  | --    | 552  | 5442 | Insertion_reverse | 0.003      | 14723      |
| --_6901_8812 | --    | 6901 | 8812 | Insertion_reverse | 0.003      | 11744      |
| --_2983_7883 | --    | 2983 | 7883 | Insertion_reverse | 0.003      | 14733      |
| --_176_490   | --    | 176  | 490  | Insertion_reverse | 0.003      | 10147      |
| --_1072_1974 | --    | 1072 | 1974 | Insertion_reverse | 0.003      | 10735      |
| --_3885_7826 | --    | 3885 | 7826 | Insertion_reverse | 0.003      | 13774      |
| --_3087_8779 | --    | 3087 | 8779 | Insertion_reverse | 0.003      | 15525      |
| +_-762_8125  | + -   | 762  | 8125 | 5cb/sb            | 0.003      | 8887       |
| +_-7968_6287 | + -   | 7968 | 6287 | 5cb/sb            | 0.003      | 14255      |
| +_-3458_7776 | + -   | 3458 | 7776 | 5cb/sb            | 0.003      | 11234      |
| +_-9776_9177 | + -   | 9776 | 9177 | 5cb/sb            | 0.003      | 18953      |
| +_-1706_7656 | + -   | 1706 | 7656 | 5cb/sb            | 0.003      | 9362       |
| +_-2677_3537 | + -   | 2677 | 3537 | 5cb/sb            | 0.003      | 6214       |
| +_-5359_7710 | + -   | 5359 | 7710 | 5cb/sb            | 0.003      | 13069      |

|              |    |      |      |        |       |       |
|--------------|----|------|------|--------|-------|-------|
| +_-3497_970  | +- | 3497 | 970  | 5cb/sb | 0.003 | 4467  |
| +_-163_4932  | +- | 163  | 4932 | 5cb/sb | 0.003 | 5095  |
| +_-1039_8979 | +- | 1039 | 8979 | 5cb/sb | 0.003 | 10018 |
| +_-4015_102  | +- | 4015 | 102  | 5cb/sb | 0.003 | 4117  |
| +_-1460_2998 | +- | 1460 | 2998 | 5cb/sb | 0.003 | 4458  |
| -+_2354_4290 | -+ | 2354 | 4290 | 3cb/sb | 0.003 | 13022 |
| -+_2387_1501 | -+ | 2387 | 1501 | 3cb/sb | 0.003 | 15778 |
| -+_9114_6940 | -+ | 9114 | 6940 | 3cb/sb | 0.003 | 3612  |
| -+_4967_8432 | -+ | 4967 | 8432 | 3cb/sb | 0.003 | 6267  |
| -+_2543_1035 | -+ | 2543 | 1035 | 3cb/sb | 0.003 | 16088 |
| -+_8434_7304 | -+ | 8434 | 7304 | 3cb/sb | 0.003 | 3928  |
| -+_3409_4133 | -+ | 3409 | 4133 | 3cb/sb | 0.003 | 12124 |
| -+_9054_3200 | -+ | 9054 | 3200 | 3cb/sb | 0.003 | 7412  |
| -+_3324_6240 | -+ | 3324 | 6240 | 3cb/sb | 0.003 | 10102 |
| -+_6126_9614 | -+ | 6126 | 9614 | 3cb/sb | 0.003 | 3926  |
| -+_8306_7679 | -+ | 8306 | 7679 | 3cb/sb | 0.003 | 3681  |
| -+_4255_7271 | -+ | 4255 | 7271 | 3cb/sb | 0.003 | 8140  |
